# Supplementary material for: Temperature Differentially Affects Gene Expression in Antarctic Thraustochytrid Oblongichytrium sp. RT2316-13
Source: MDPI journal article supplement (doi:10.3390/md18110563), 2020-11-18
Supplement: s1 [file s1]

**Supplemental Material**

**Temperature differentially affects gene expression in Antarctic thraustochytrid**

***Oblongichytrium* sp. RT2316-13**

Paris Paredes, Giovanni Larama, Liset Flores, Allison Leyton, Carmen Gloria Ili, Juan A.

Asenjo, Yusuf Chisti, Carolina Shene

1. Table S1 to S3.

2. Figure S1.

3. Excel file Paredes\_et\_al.xlsx.

**Table S1.** Sequencing results. The initial amount of reads (total reads) and the number of reads that passed quality control filters (HQ reads).

| Condition | ID       | Total reads | HQ reads   | HQ reads (%) |
|-----------|----------|-------------|------------|--------------|
| Control   | GM1595-1 | 30,853,728  | 30,688,242 | 99.46        |
| Control   | GM1595-2 | 47,592,052  | 47,358,355 | 99.51        |
| Control   | GM1595-3 | 21,876,024  | 21,759,224 | 99.47        |
| Treatment | GM1595-4 | 25,468,998  | 25,337,912 | 99.49        |
| Treatment | GM1595-5 | 24,655,850  | 24,529,757 | 99.49        |
| Treatment | GM1595-6 | 24,124,200  | 23,985,768 | 99.43        |

**Table S2.** Total number of high quality (HQ) reads that were mapped to a sequence in RT2316-13 transcriptome, concordantly one or more times (properly aligned), and the total number of reads aligned (overall aligned), with their respective mapping rate (%).

| ID       | HQ reads   | Properly<br>aligned | Overall<br>aligned | Properly<br>aligned<br>mapping rate<br>(%) | Overall<br>mapping<br>rate (%) |
|----------|------------|---------------------|--------------------|--------------------------------------------|--------------------------------|
| GM1595-1 | 30,688,242 | 27,437,849          | 30,383,019         | 89.41                                      | 99.01                          |
| GM1595-2 | 47,358,355 | 42,773,627          | 46,999,661         | 90.32                                      | 99.24                          |
| GM1595-3 | 21,759,224 | 19,310,940          | 21,553,763         | 88.75                                      | 99.06                          |
| GM1595-4 | 25,337,912 | 24,353,793          | 25,094,881         | 96.12                                      | 99.04                          |
| GM1595-5 | 24,529,757 | 23,699,786          | 24,327,830         | 96.61                                      | 99.18                          |
| GM1595-6 | 23,985,768 | 21,237,876          | 23,773,688         | 88.55                                      | 99.12                          |
|          |            |                     | Average            | 91.63                                      | >99.0                          |

**Table S3.** Primers used for identifying genes related to production of fatty acids.

| Gene                      | Gene<br>abbreviation <sup>§</sup> | Sequence              | T <sub>m</sub> ( °C) |
|---------------------------|-----------------------------------|-----------------------|----------------------|
| Malic enzyme              | Me_F                              | AAGCCTGCCAAGAGTTCCA   | 56.9                 |
|                           | Me_R                              | GCCAGTTGTTACGAGAGTC   | 55.9                 |
| Acetyl-CoA<br>carboxylase | ACC_F                             | GAGACCACTTACCGCCTGTT  | 57.0                 |
|                           | ACC_R                             | CGCCAATGAGCACAAGGAAG  | 56.8                 |
| PKS subunit A             | Pfaa_F                            | AGCCTCCTTGATAGCCTTCTC | 56.2                 |
|                           | Pfaa_R                            | TCTGGTGCGTGTTCTTGGT   | 56.9                 |
| PKS subunit C             | Pfac_F                            | CTGGTGGTGGTGGTGGATG   | 56.1                 |
|                           | Pfac_R                            | GCTGCTTGCGGACATTGT    | 56.6                 |
| 18S rRNA                  | 18s_F                             | TGCCGACTTGCGATTGTTG   | 56.4                 |
|                           | 18s_R                             | TTCAGCCTTGCGACCATACT  | 56.5                 |

<sup>§</sup>Forward primers (\_F) and reverse primers (\_R). The sequences were obtained from Ma et al. [29]. T<sub>m</sub> = melting temperature.

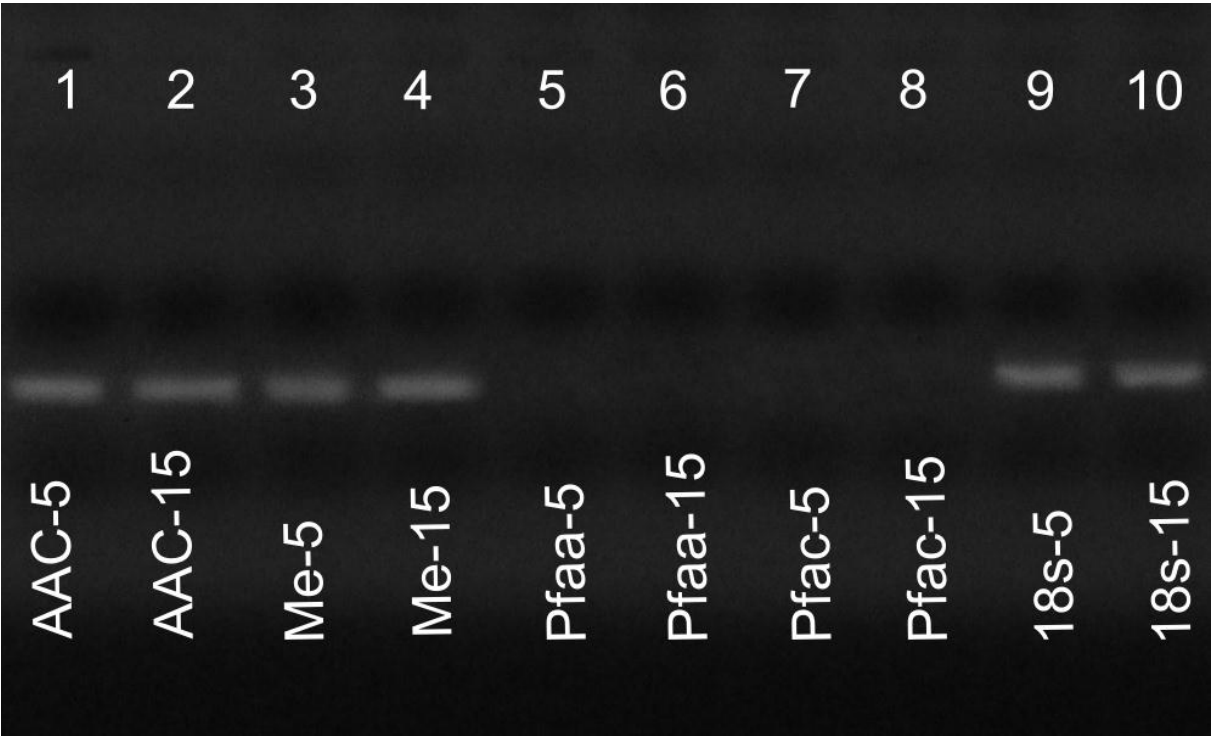

36

37

38

39

40

41

42

**Figure S1.** Amplification of cDNA segments. AAC, acetyl-CoA carboxylase; Me, malic enzyme; Pfaa, subunit A of PKS gene; Pfac, subunit C of PKS gene; 18s, 18S subunit of RNA. xx-5 and xx-15 denote cDNA of cells grown at 5 and 15 °C, respectively.
